# Supplementary material for: Indirect electroanalytical detection of phenols
Source: Royal Society of Chemistry journal article supplement (doi:10.1039/c4an02374a), 2015-01-01

### Electronic Support Information (ESI)

**Figure S1** Cyclic voltammetric responses obtained in the absence (solid line) and presence (dashed line) of  $10 \text{ mgL}^{-1}$  phenol using the BDDE obtained in a pH 10 carbonate buffer solution containing  $400 \text{ mgL}^{-1}$  4-dimethylaminoantipyrine. Starting potential:  $-1.2 \text{ V}$ , first vertex potential:  $+1.0 \text{ V}$ , end potential:  $-1.2 \text{ V}$ . Scan rate:  $50 \text{ mVs}^{-1}$ .

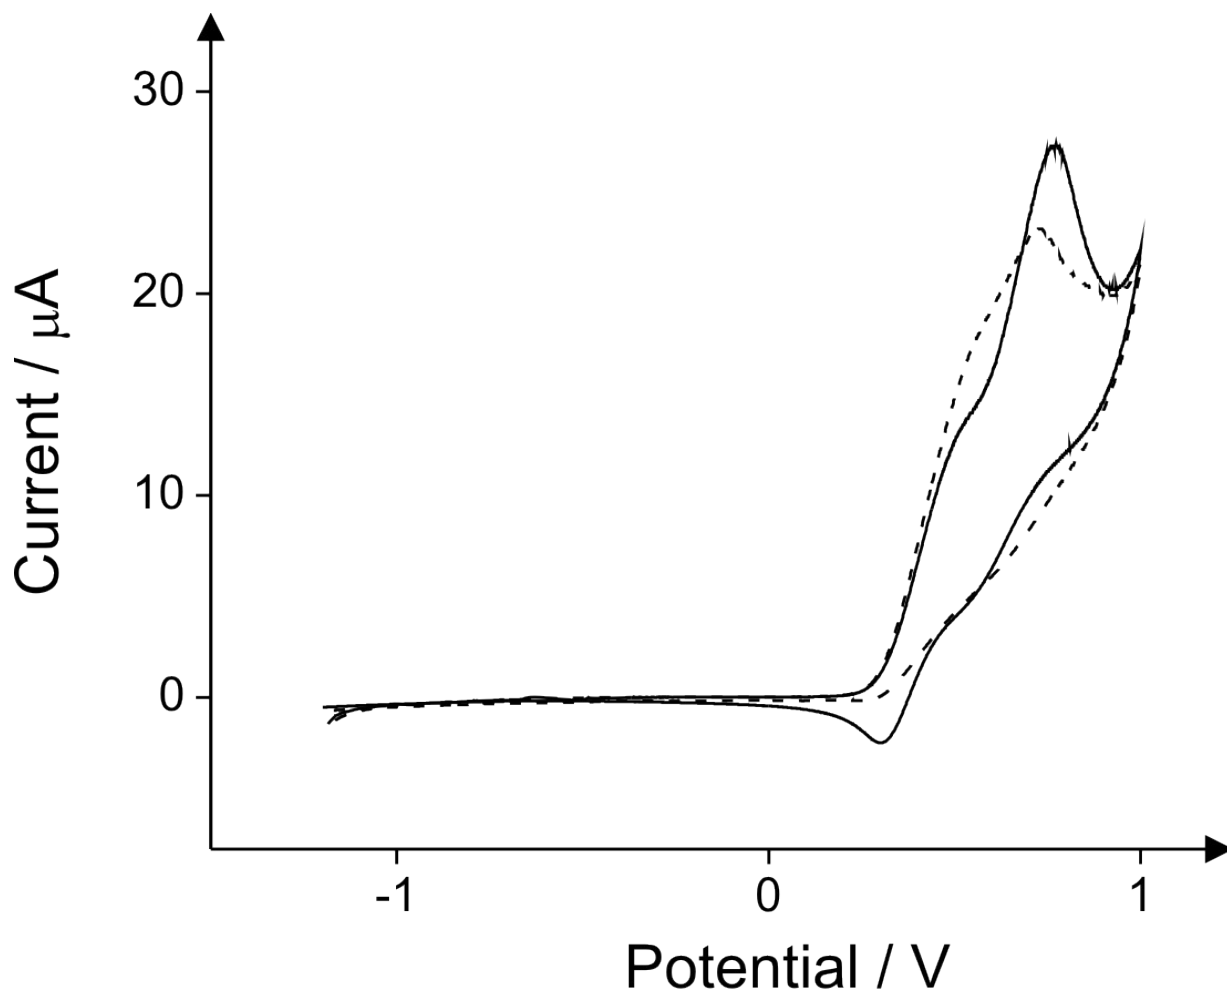

**Figure S2** Cyclic voltammetric responses of the BDDE obtained in the absence (solid line) and presence (dashed line) of  $10 \text{ mgL}^{-1}$  phenol in a pH 10 carbonate buffer solution containing  $400 \text{ mgL}^{-1}$  antipyrine. Starting potential:  $-1.2 \text{ V}$ , first vertex potential:  $+1.0 \text{ V}$ , end potential:  $-1.2 \text{ V}$ . Scan rate:  $50 \text{ mVs}^{-1}$ .

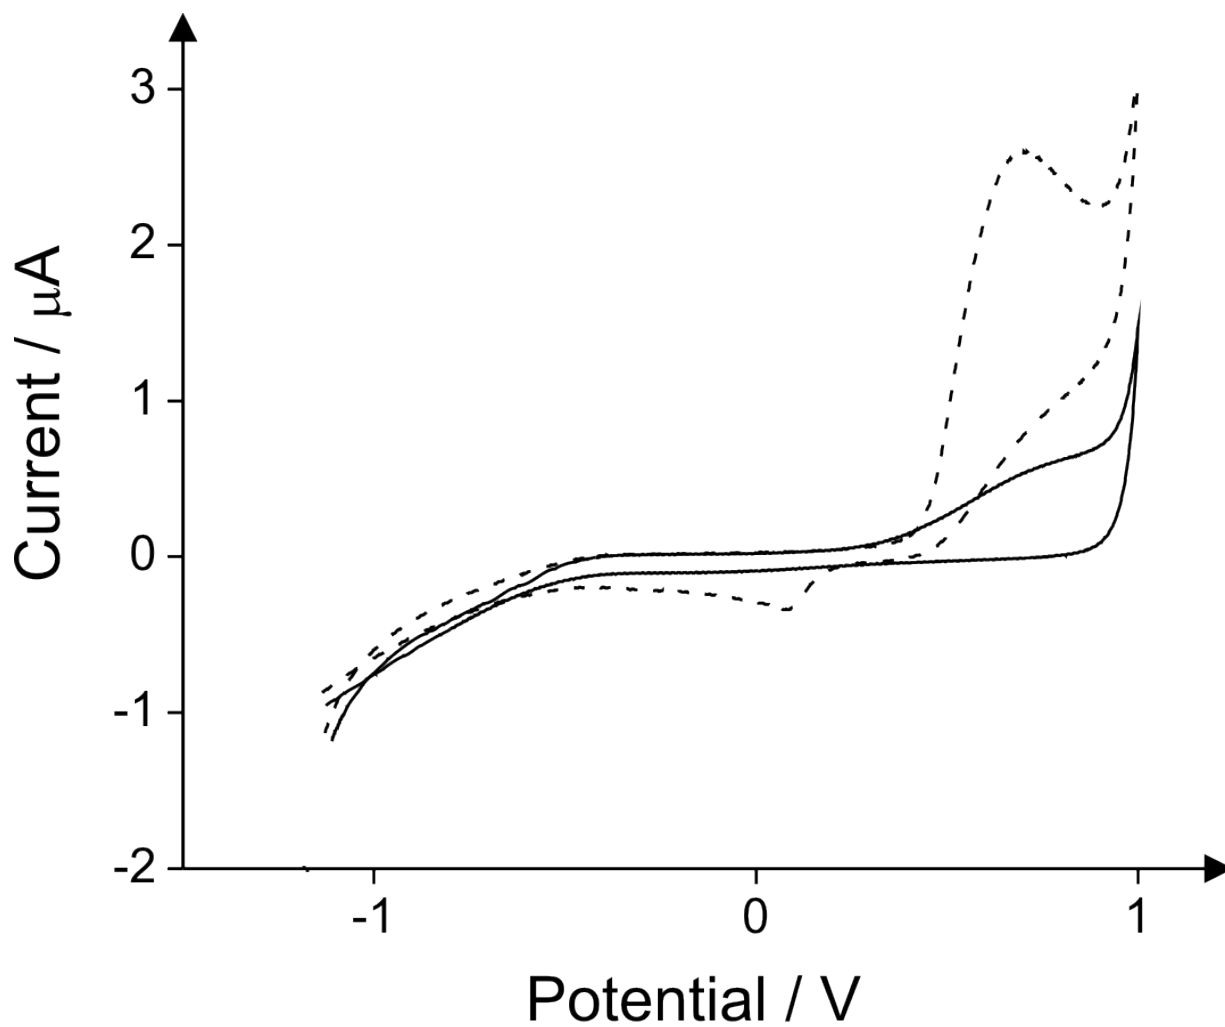

**Figure S3.** Cyclic voltammetric response of the BDDE in the absence (solid line) and presence (dashed line) of  $10 \text{ mgL}^{-1}$  phenol in pH 10 carbonate buffer solution containing  $400 \text{ mgL}^{-1}$  3-methyl-1-(2-phenylethyl)-2-pyrazolin-5-one. Starting potential:  $-1.2\text{V}$ , first vertex potential:  $+1.0\text{V}$ , end potential:  $-1.2\text{V}$ . Scan rate:  $50 \text{ mVs}^{-1}$ .

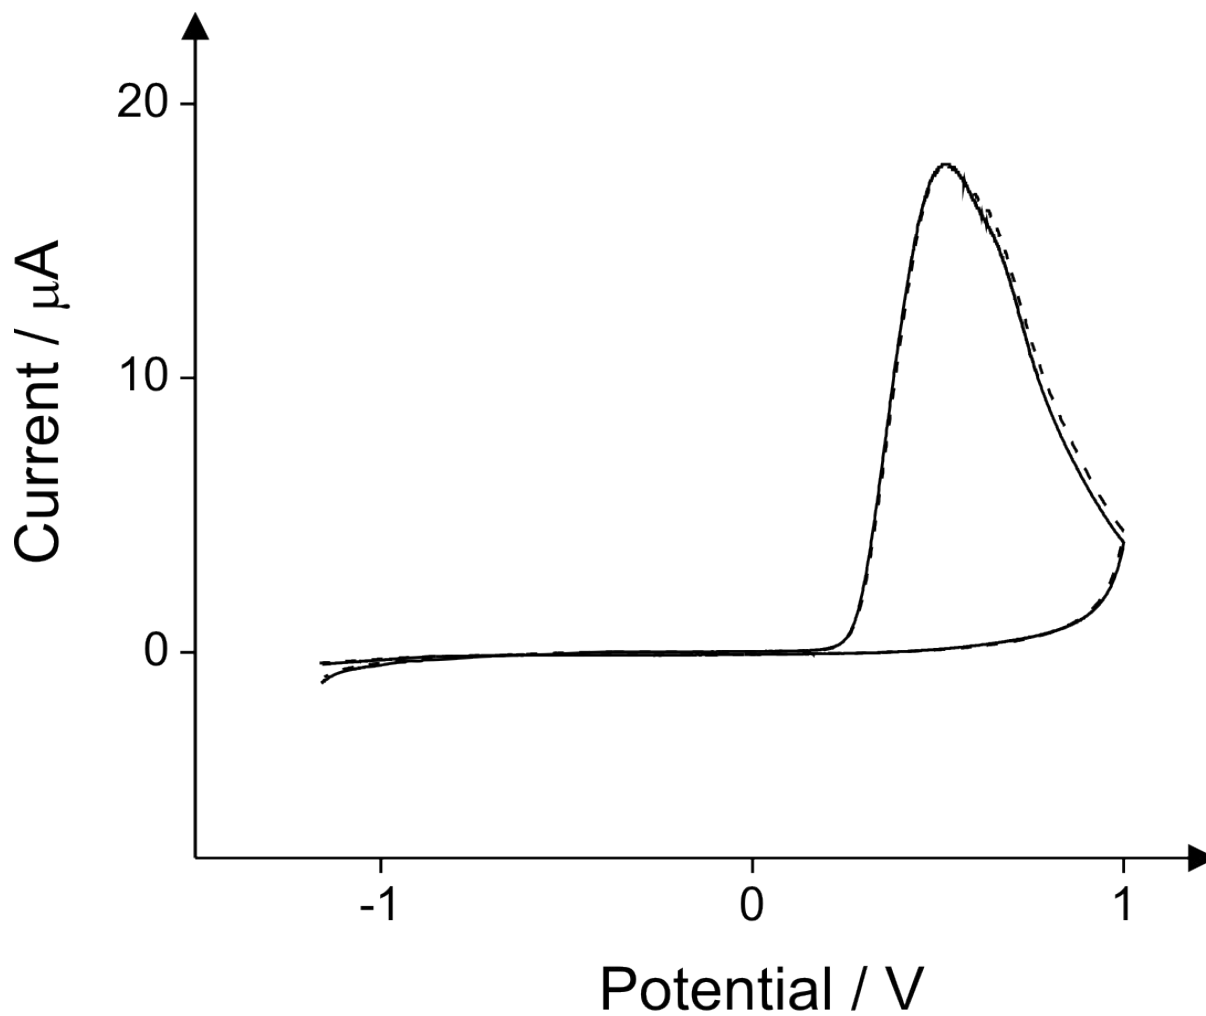

**Figure S4.** Cyclic voltammetric response of the BDDE in the absence (solid line) and presence (dashed line) of  $10 \text{ mgL}^{-1}$  phenol in pH 10 carbonate buffer solution containing  $400 \text{ mgL}^{-1}$  3-amino-1-(1-naphthylmethyl)-2-pyrazolin-5-one. Starting potential:  $-1.2\text{V}$ , first vertex potential:  $+1.0\text{V}$ , end potential:  $-1.2\text{V}$ . Scan rate:  $50 \text{ mVs}^{-1}$ .

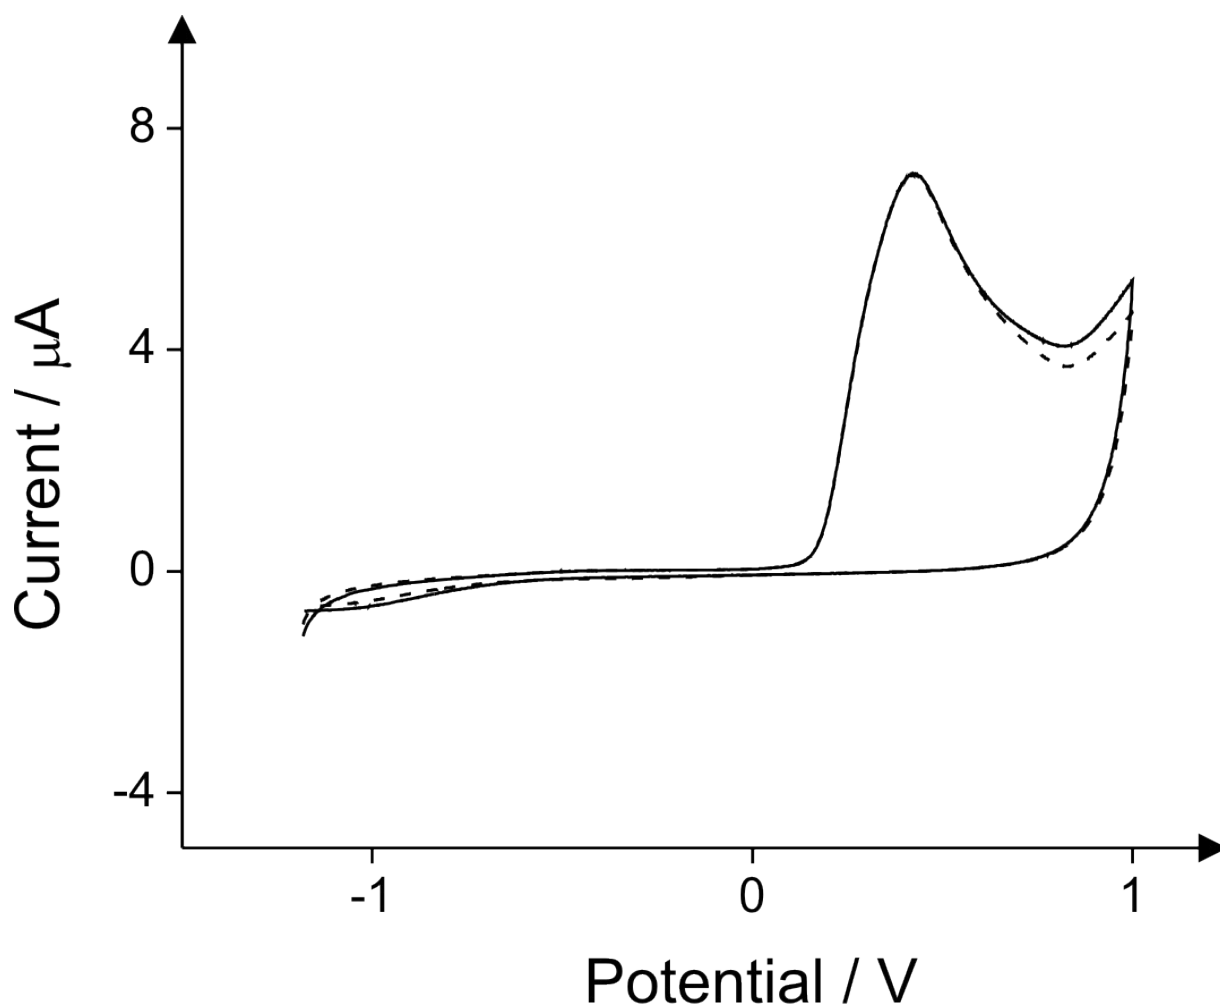

**Figure S5.** Cyclic voltammetric response of the BDDE in the absence (solid line) and presence (dash line) of  $10 \text{ mgL}^{-1}$  phenol in Carbonate Buffer Solution pH 10 containing  $400 \text{ mgL}^{-1}$  4-amino-1,2-dimethyl-3-pentadecyl-3-pyrazolin-5-one hydrochloride. Starting potential:  $-1.2\text{V}$ , first vertex potential:  $+1.0\text{V}$ , end potential:  $-1.2\text{V}$ . Scan rate:  $50 \text{ mVs}^{-1}$ .

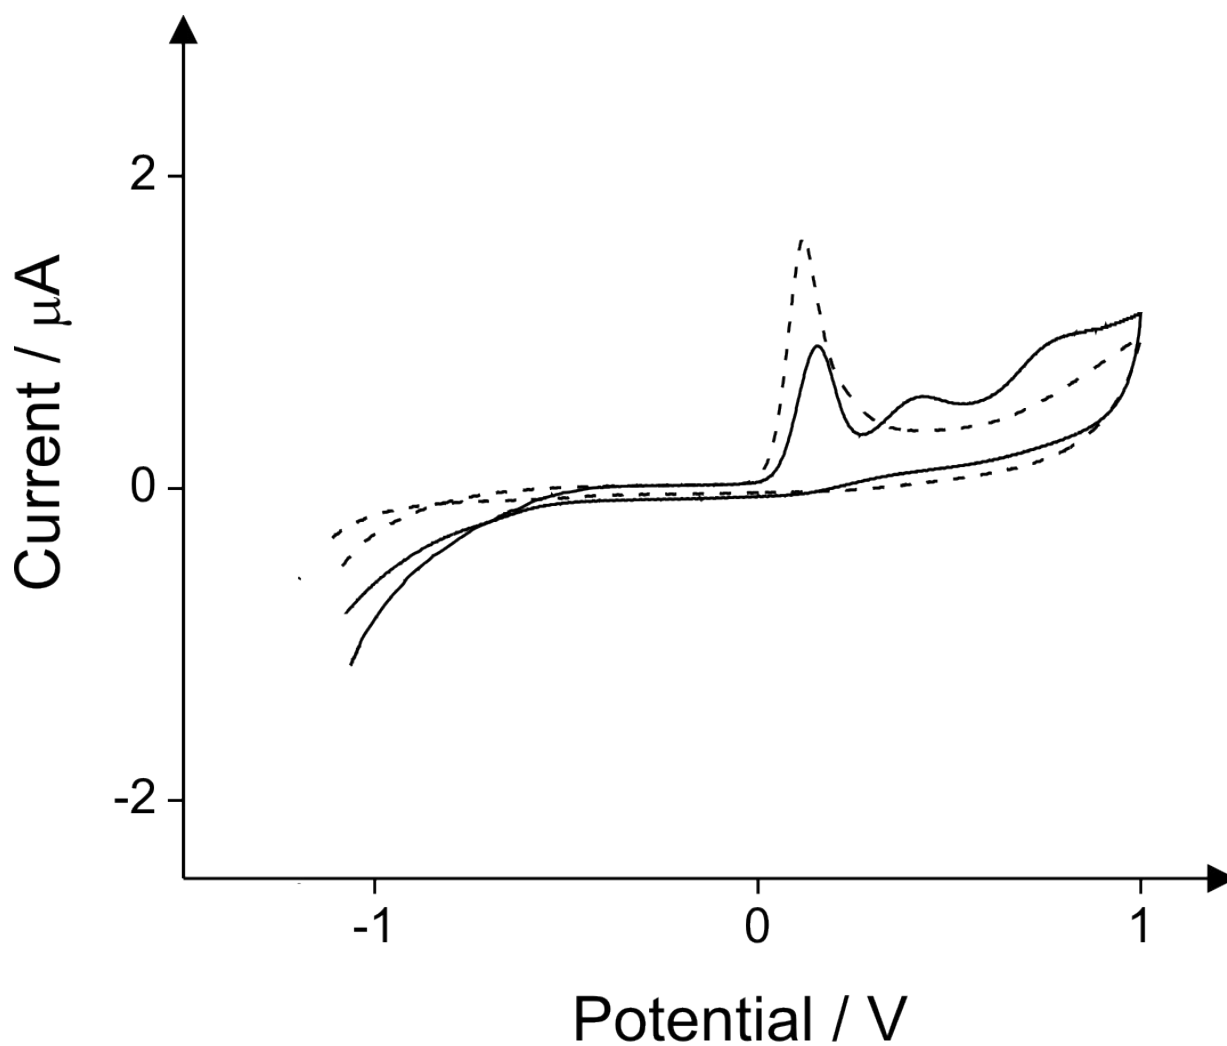

**Figure S6.** Cyclic voltammetric response of the BDDE in the absence (solid line) and presence (dash line) of  $10 \text{ mgL}^{-1}$  phenol in pH 10 carbonate buffer solution containing  $400 \text{ mgL}^{-1}$  3-amino-1-(2-amino-4-methylsulfonylphenyl)-2-pyrazolin-5-one hydrochloride. Starting potential:  $-1.2\text{V}$ , first vertex potential:  $1.0\text{V}$ , end potential:  $-1.2\text{V}$ . Scan rate:  $50 \text{ mVs}^{-1}$ .

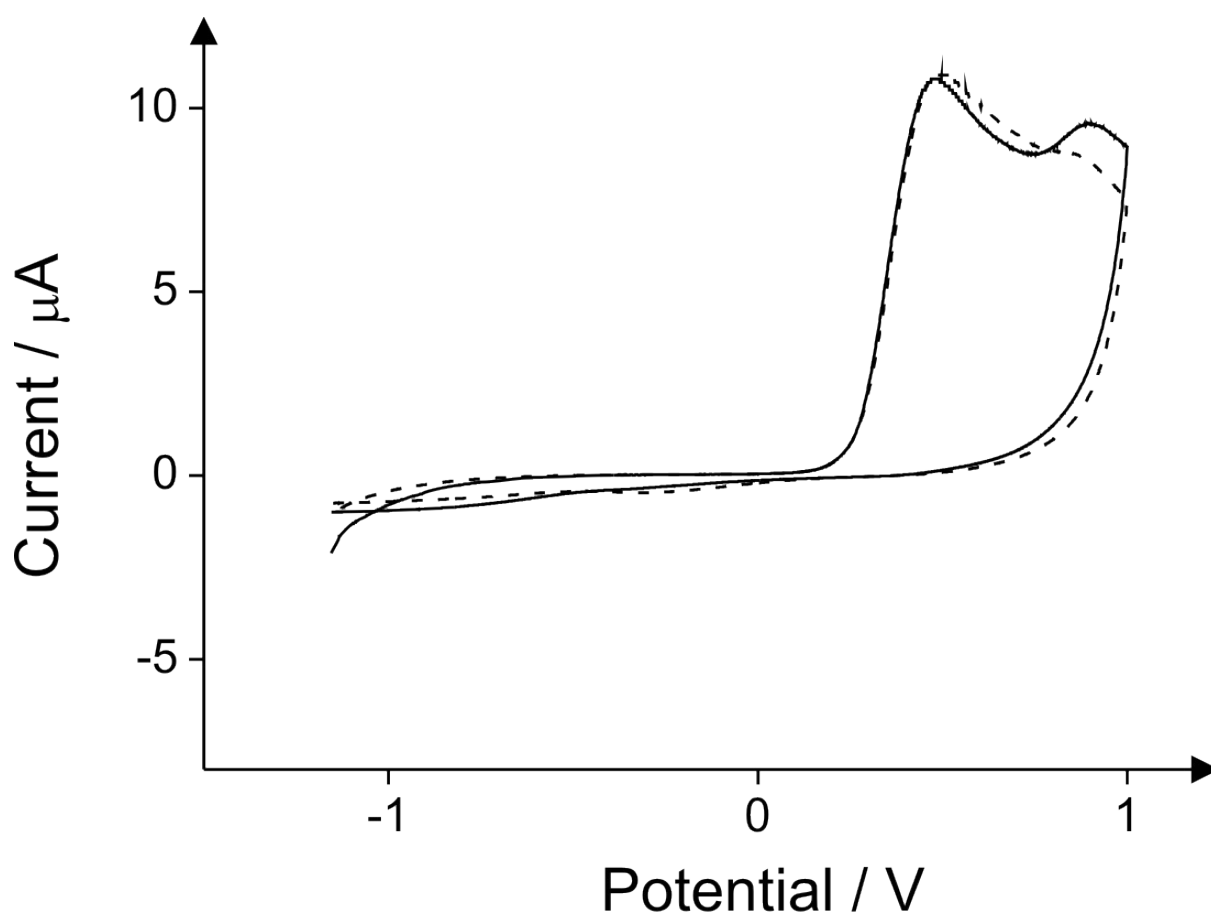

**Figure S7.** Cyclic voltammetric response of the BDDE in the absence (solid line) and presence (dashed line) of  $10 \text{ mgL}^{-1}$  phenol in pH 10 carbonate buffer solution containing  $400 \text{ mgL}^{-1}$  4-aminoantipyrine. Starting potential:  $-1.2\text{V}$ , first vertex potential:  $+1.0\text{V}$ , end potential:  $-1.2\text{V}$ . Scan rate:  $50 \text{ mVs}^{-1}$ .

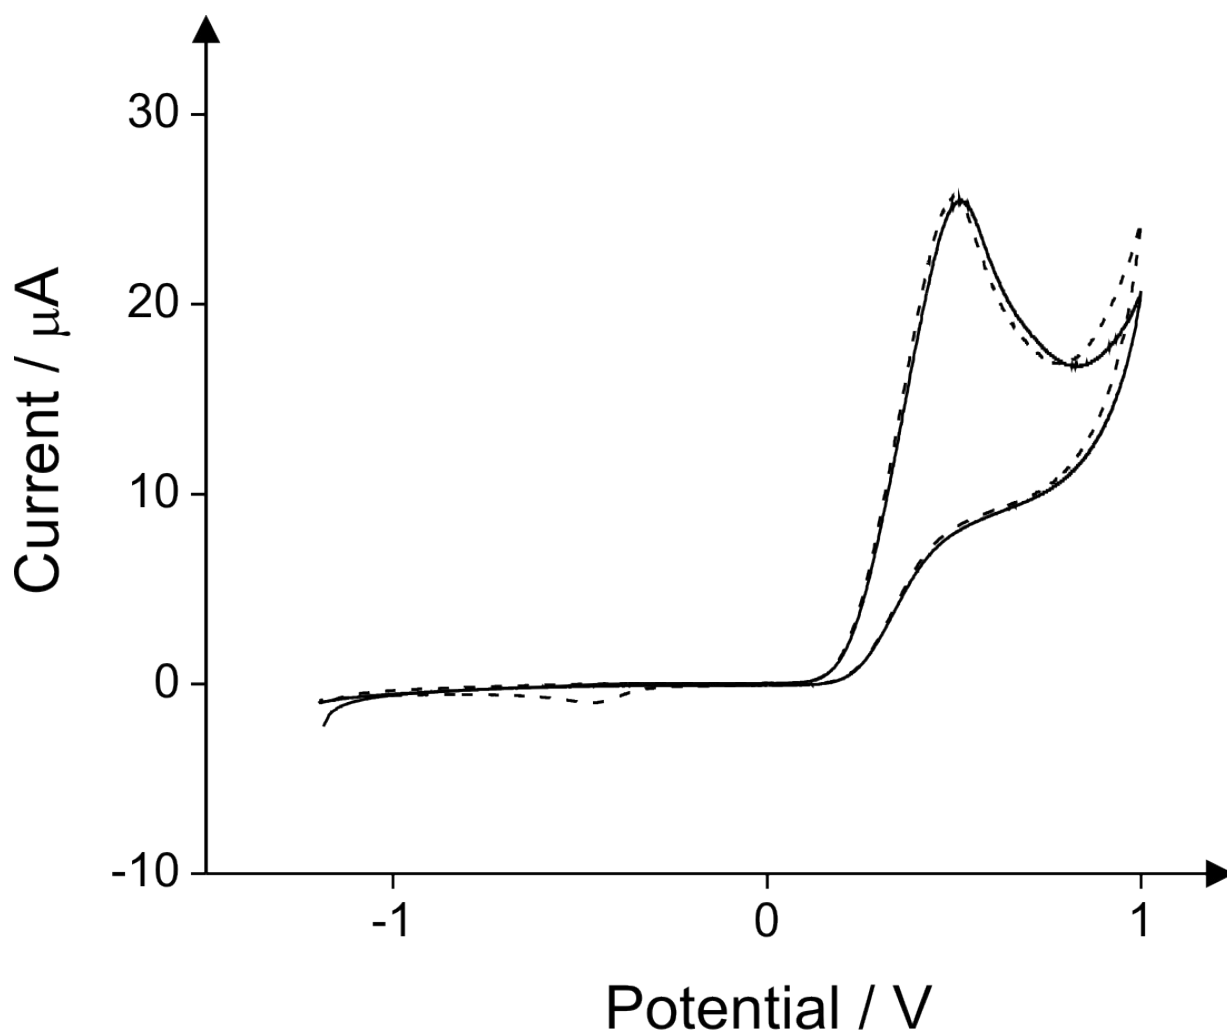

Supplement: c4an02374a1.pdf [file c4an02374a1.pdf]
